# Supplementary material for: Kinetic mechanism of Na+-coupled aspartate transport catalyzed by GltTk
Source: PubMed Central journal article supplement (PMC8211817; doi:10.1038/s42003-021-02267-y), 2021-06-17
Supplement: 42003_2021_2267_MOESM3_ESM.pdf [file 42003_2021_2267_MOESM3_ESM.pdf]

## **Description of Additional Supplementary Files**

**File name:** Supplementary Data 1

**Description:** The source data underlying Figures 1-4 and Tables 1-4.
